# Supplementary material for: A highly efficient rGO grafted MoS2 nanocomposite for dye adsorption and electrochemical detection of hydroquinone in wastewater
Source: Royal Society of Chemistry journal article supplement (doi:10.1039/d2nj04285a), 2022-01-01
Supplement: d2nj04285a1.pdf [file d2nj04285a1.pdf]

### Supplementary Information

#### **Highly efficient rGO-MoS<sub>2</sub> nanohybrid based laccase biosensor for hydroquinone detection in waste water**

Sakshi Verma, Chandra Mouli Pandey, D Kumar

**Figure S1.** UV visible spectra of (i) GO and (ii) rGO-MoS<sub>2</sub>

**Figure S2.** (A) Adsorption studies of 10 ppm MB under 2.5mg of rGO-MoS<sub>2</sub> nanocomposite using UV-Visible spectroscopy (B) Pseudo first order kinetics plot (C) Temkin adsorption isotherm plot (D) Freundlich adsorption isotherm plot

**Figure S3.** Zeta potential distribution of rGO-MoS<sub>2</sub> nanocomposite in DI

**Figure S4.** Comparison between CV (i) rGO-MoS<sub>2</sub>/ITO (ii) GO/ITO (iii) Lac/rGO-MoS<sub>2</sub>/ITO electrode and (iv) Hq/Lac/rGO-MoS<sub>2</sub>/ITO electrode measured at 50 mV/s in PBS consisting of 5mM [Fe(CN)<sub>6</sub>]<sup>3-</sup> and [Fe(CN)<sub>6</sub>]<sup>4-</sup>

**Figure S5.** Variation of concentration of Lac enzyme immobilized onto rGO-MoS<sub>2</sub>/ITO for 100 μM Hq using Chronoamperometry

**Figure S6.** Variation of pH for PBS buffer for biosensing of 100 μM Hq using Chronoamperometry

**Figure S7.** Reproducibility of the fabricated biosensor at 100 μM Hq

**Table 1.** Comparison of adsorption capacity of different materials towards MB dye

**Table 2.** Feasibility of adsorption equations and isotherms towards adsorption of MB dye using rGO-MoS<sub>2</sub> with other parameters

Fig.S1

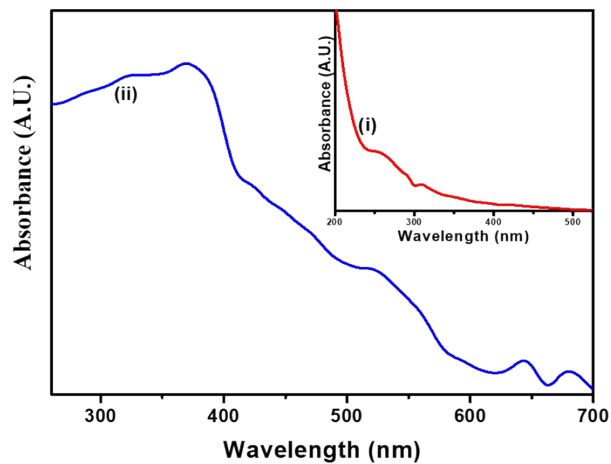

Fig.S2

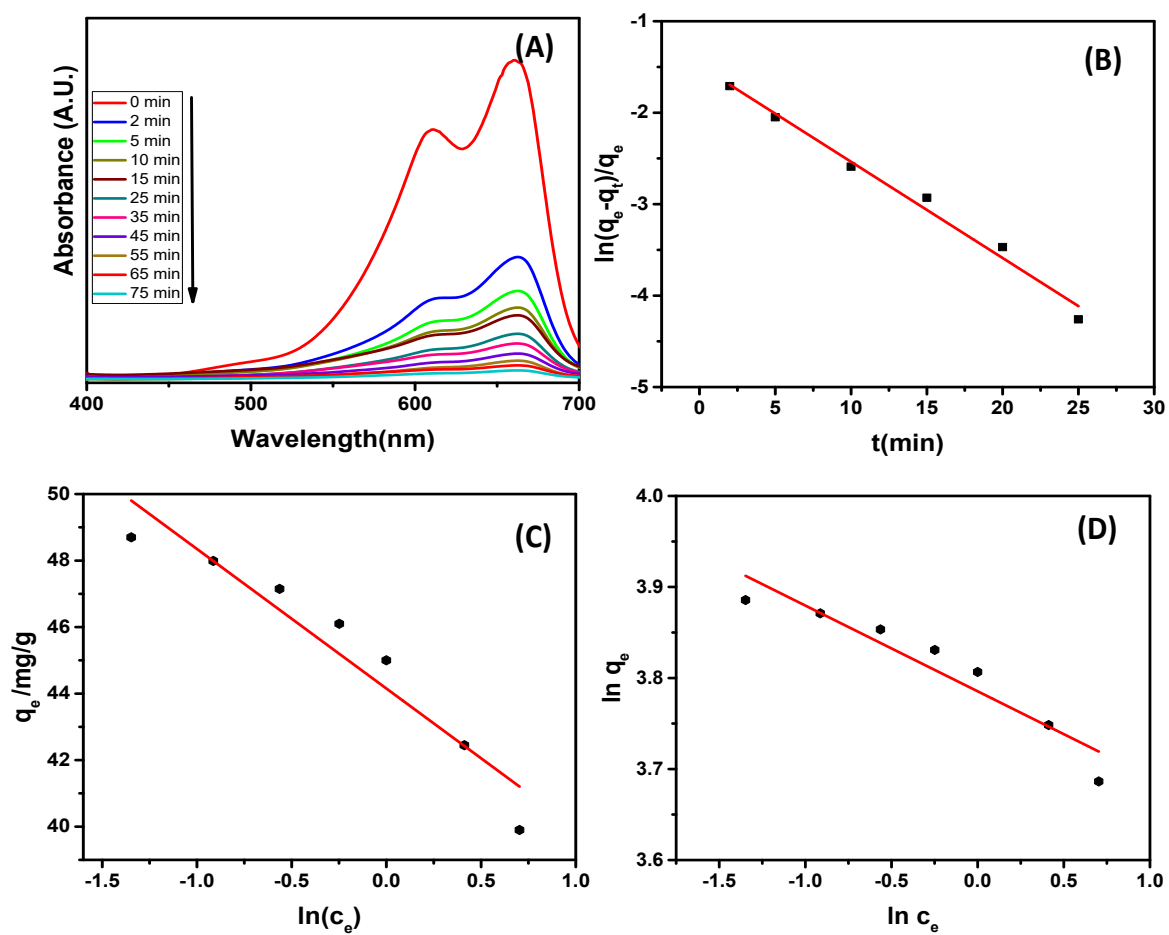

**Fig.S3**

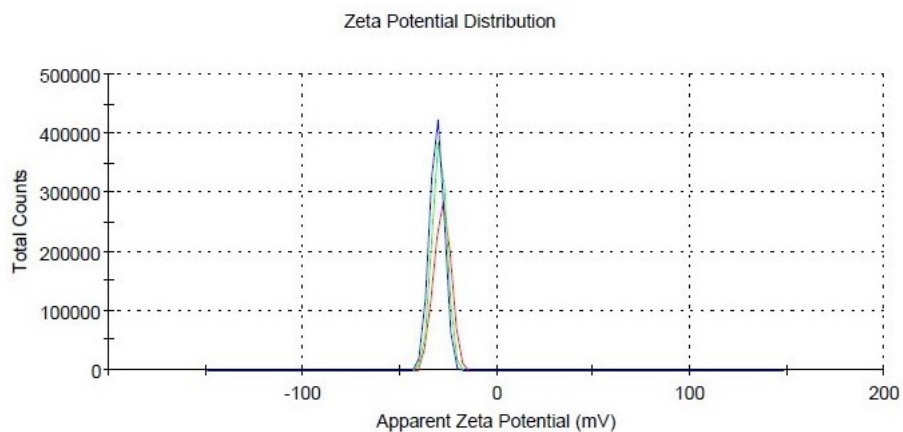

**Fig.S4**

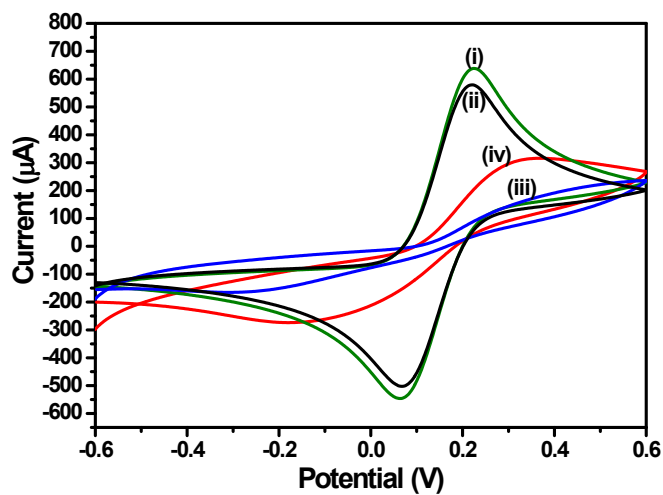

**Fig.S5**

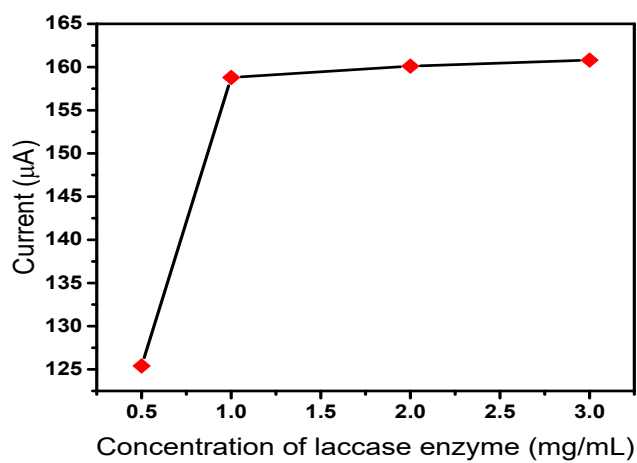

Fig.S6

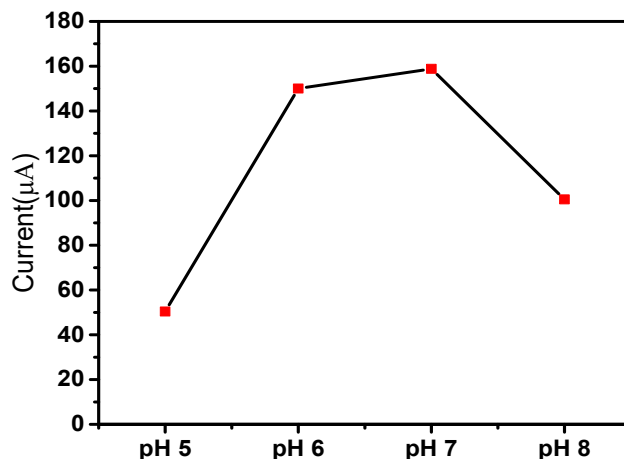

Fig.S7

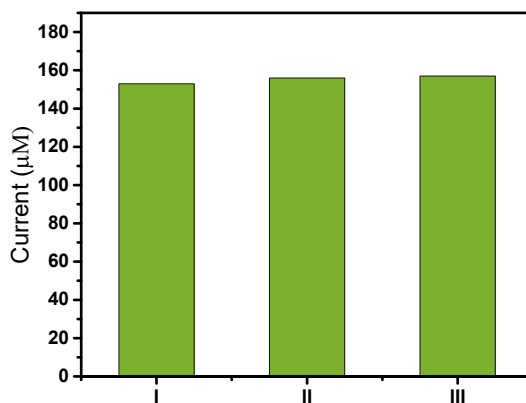

Table S1.

| Adsorbent                                                  | Adsorption capacity        | Concentration of MB                                                                  | Reference          |
|------------------------------------------------------------|----------------------------|--------------------------------------------------------------------------------------|--------------------|
| CNT                                                        | 35.4 mg/g                  | 20 ppm                                                                               | [1]                |
| Graphene                                                   | 39.92 mg/g                 | 20 ppm                                                                               | [2]                |
| <b>Equations</b>                                           | <b>R<sup>2</sup> value</b> | <b>Other Parameter</b>                                                               | <b>Value</b>       |
| KMgFe(PO <sub>4</sub> ) <sub>2</sub><br>Pseudo first order | 22.83 mg/g<br>0.986        | 10 ppm                                                                               | [3]                |
| Electrolytic<br>Pseudo second<br>manganese anode<br>slime  | 70.74 mg/g<br>0.999        | 500 ppm<br>Rate constant(k <sub>2</sub> )<br>(g mg <sup>-1</sup> min <sup>-1</sup> ) | 0.024<br>[4]       |
| Henry<br>Nb-W complex                                      | 19.41 mg/g                 | 10 ppm<br>Rate constant                                                              | 4.998<br>[5]       |
| Temkin                                                     | 0.919                      |                                                                                      |                    |
| Langmuir                                                   | 48.7 mg/g                  | 10 ppm                                                                               |                    |
| GO-MoS <sub>2</sub><br>nanocomposite                       | 0.996                      | q <sub>m</sub> (mg g <sup>-1</sup> )                                                 | 39.06<br>This work |

Table S2.

|                   |       |                         |      |
|-------------------|-------|-------------------------|------|
|                   |       | b (L mg <sup>-1</sup> ) | 10.7 |
| <b>Freundlich</b> | 0.904 |                         |      |

## References

- [1] Y. Yao, F. Xu, M. Chen, Z. Xu, and Z. Zhu, "Adsorption behavior of methylene blue on carbon nanotubes," *Bioresour. Technol.* 101, (2010) 3040–3046. doi: <https://doi.org/10.1016/j.biortech.2009.12.042>.
- [2] T. Liu *et al.*, "Adsorption of methylene blue from aqueous solution by graphene," *Colloids Surfaces B Biointerfaces*. 90 (2012) 197–203. doi: <https://doi.org/10.1016/j.colsurfb.2011.10.019>.
- [3] A. Badri, I. Alvarez-Serrano, M. Luisa López, and M. Ben Amara, "Sol-gel synthesis, magnetic and methylene blue adsorption properties of lamellar iron monophosphate  $\text{KMgFe}(\text{PO}_4)_2$ ," *Inorg. Chem. Commun.* 121 (2020) 108217. doi: <https://doi.org/10.1016/j.inoche.2020.108217>.
- [4] P. Su *et al.*, "Hydroxylation of electrolytic manganese anode slime with EDTA-2Na and its adsorption of methylene blue," *Sep. Purif. Technol.* 278, (2021) 119526. doi: <https://doi.org/10.1016/j.seppur.2021.119526>.
- [5] J. Yu, Y. Han, H. Jong, H. I. Jong, and G. Ra, "Two-step hydrothermal synthetic method of niobium-tungsten complex oxide and its adsorption of methylene blue," *Inorganica Chim. Acta*. 507 (2020) 119562. doi: <https://doi.org/10.1016/j.ica.2020.119562>.
- [6] A. Kołodziejczak-Radzimska, A. Budna, F. Ciesielczyk, D. Moszyński, and T. Jesionowski, "Laccase from *Trametes versicolor* supported onto mesoporous  $\text{Al}_2\text{O}_3$ : Stability tests and evaluations of catalytic activity," *Process Biochem.* 95 (2020) 71–80. doi: <https://doi.org/10.1016/j.procbio.2020.05.008>.
- [7] G. Aydoğdu Tığ, D. Koyuncu Zeybek, S. Pekyardımcı, and E. Kiliç, "A novel amperometric biosensor based on ZnO nanoparticles-modified carbon paste electrode for determination of glucose in human serum," *Artif. Cells Nanomed. Biotechnol.* (2012) 1–7.
